# Supplementary material
Source: PubMed Central journal article supplement (PMC7030937)

# Relative abundance taxonomic charts comparing single vs triplicate PCR reactions

## A) Broad range of sample types

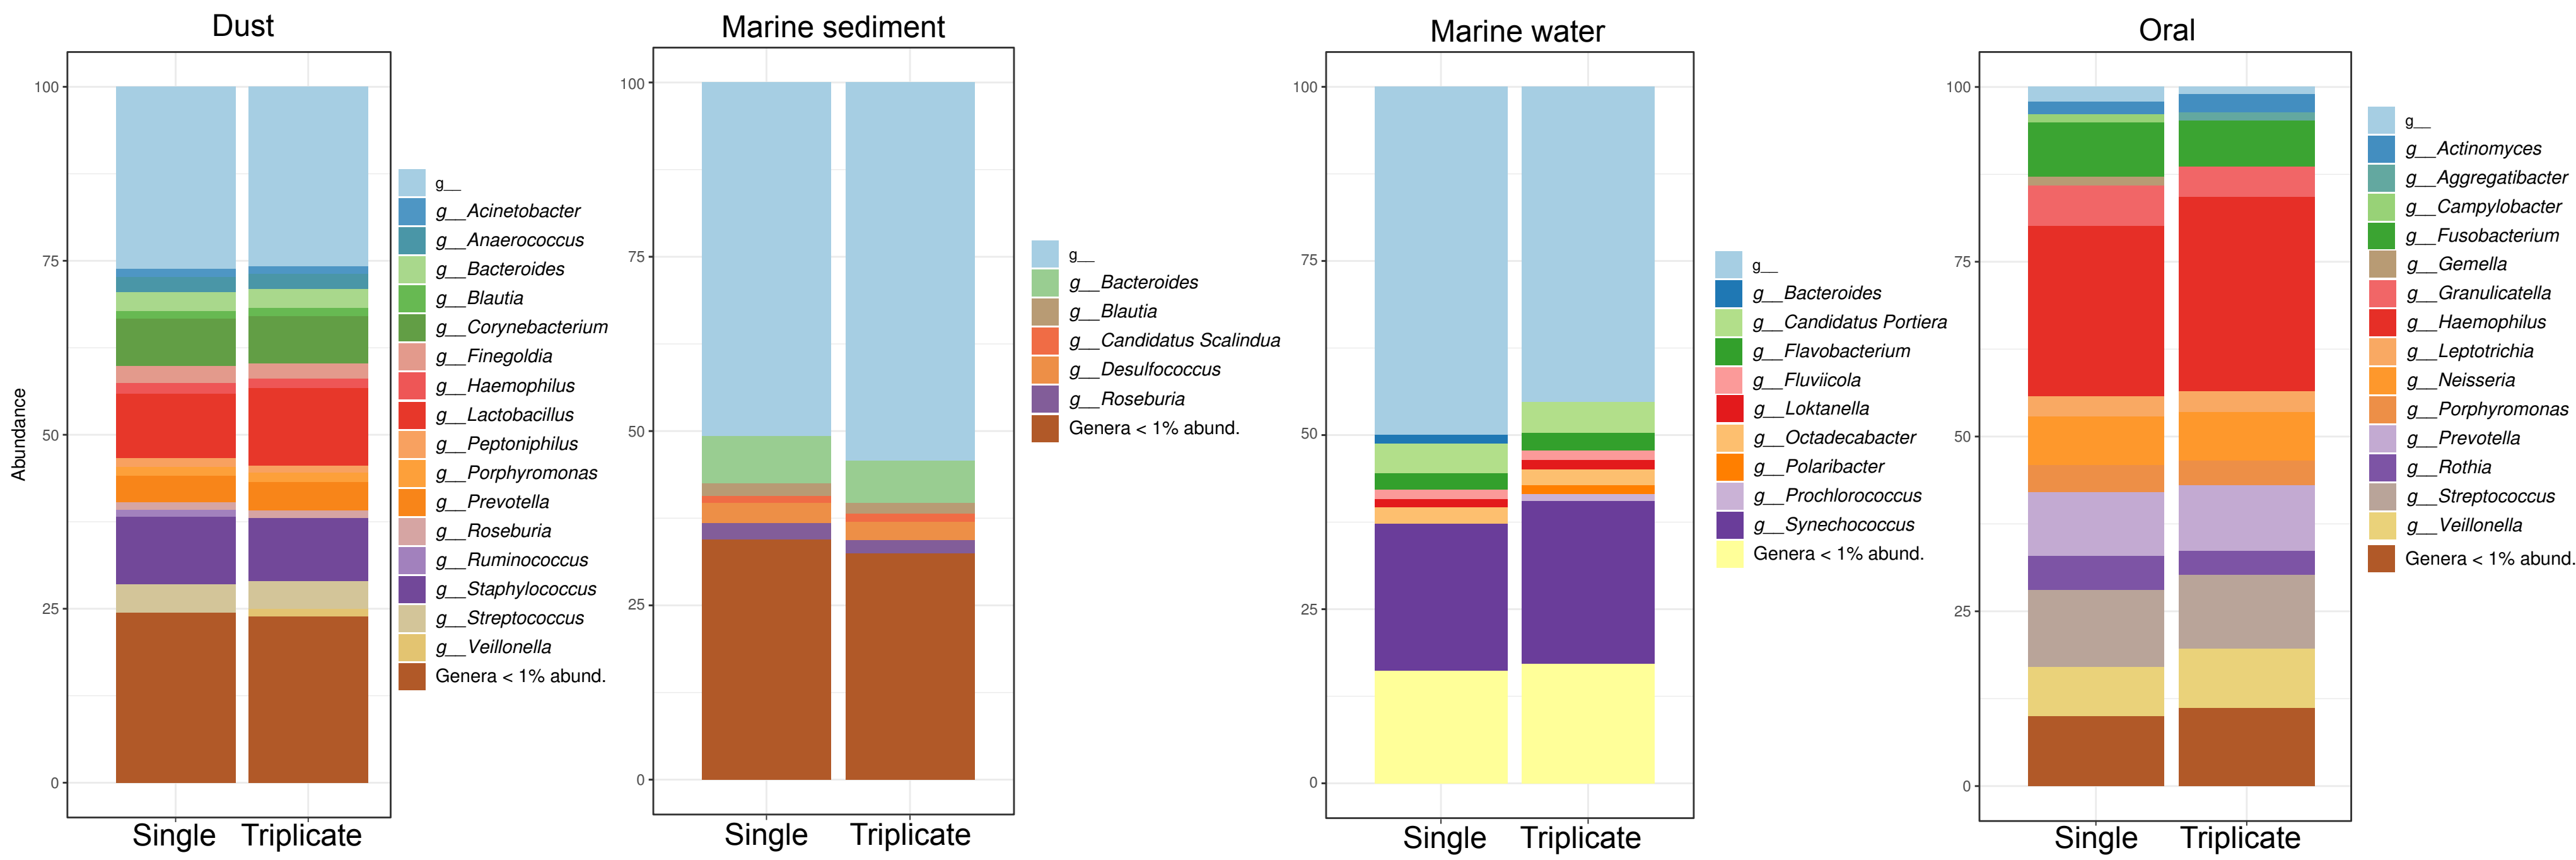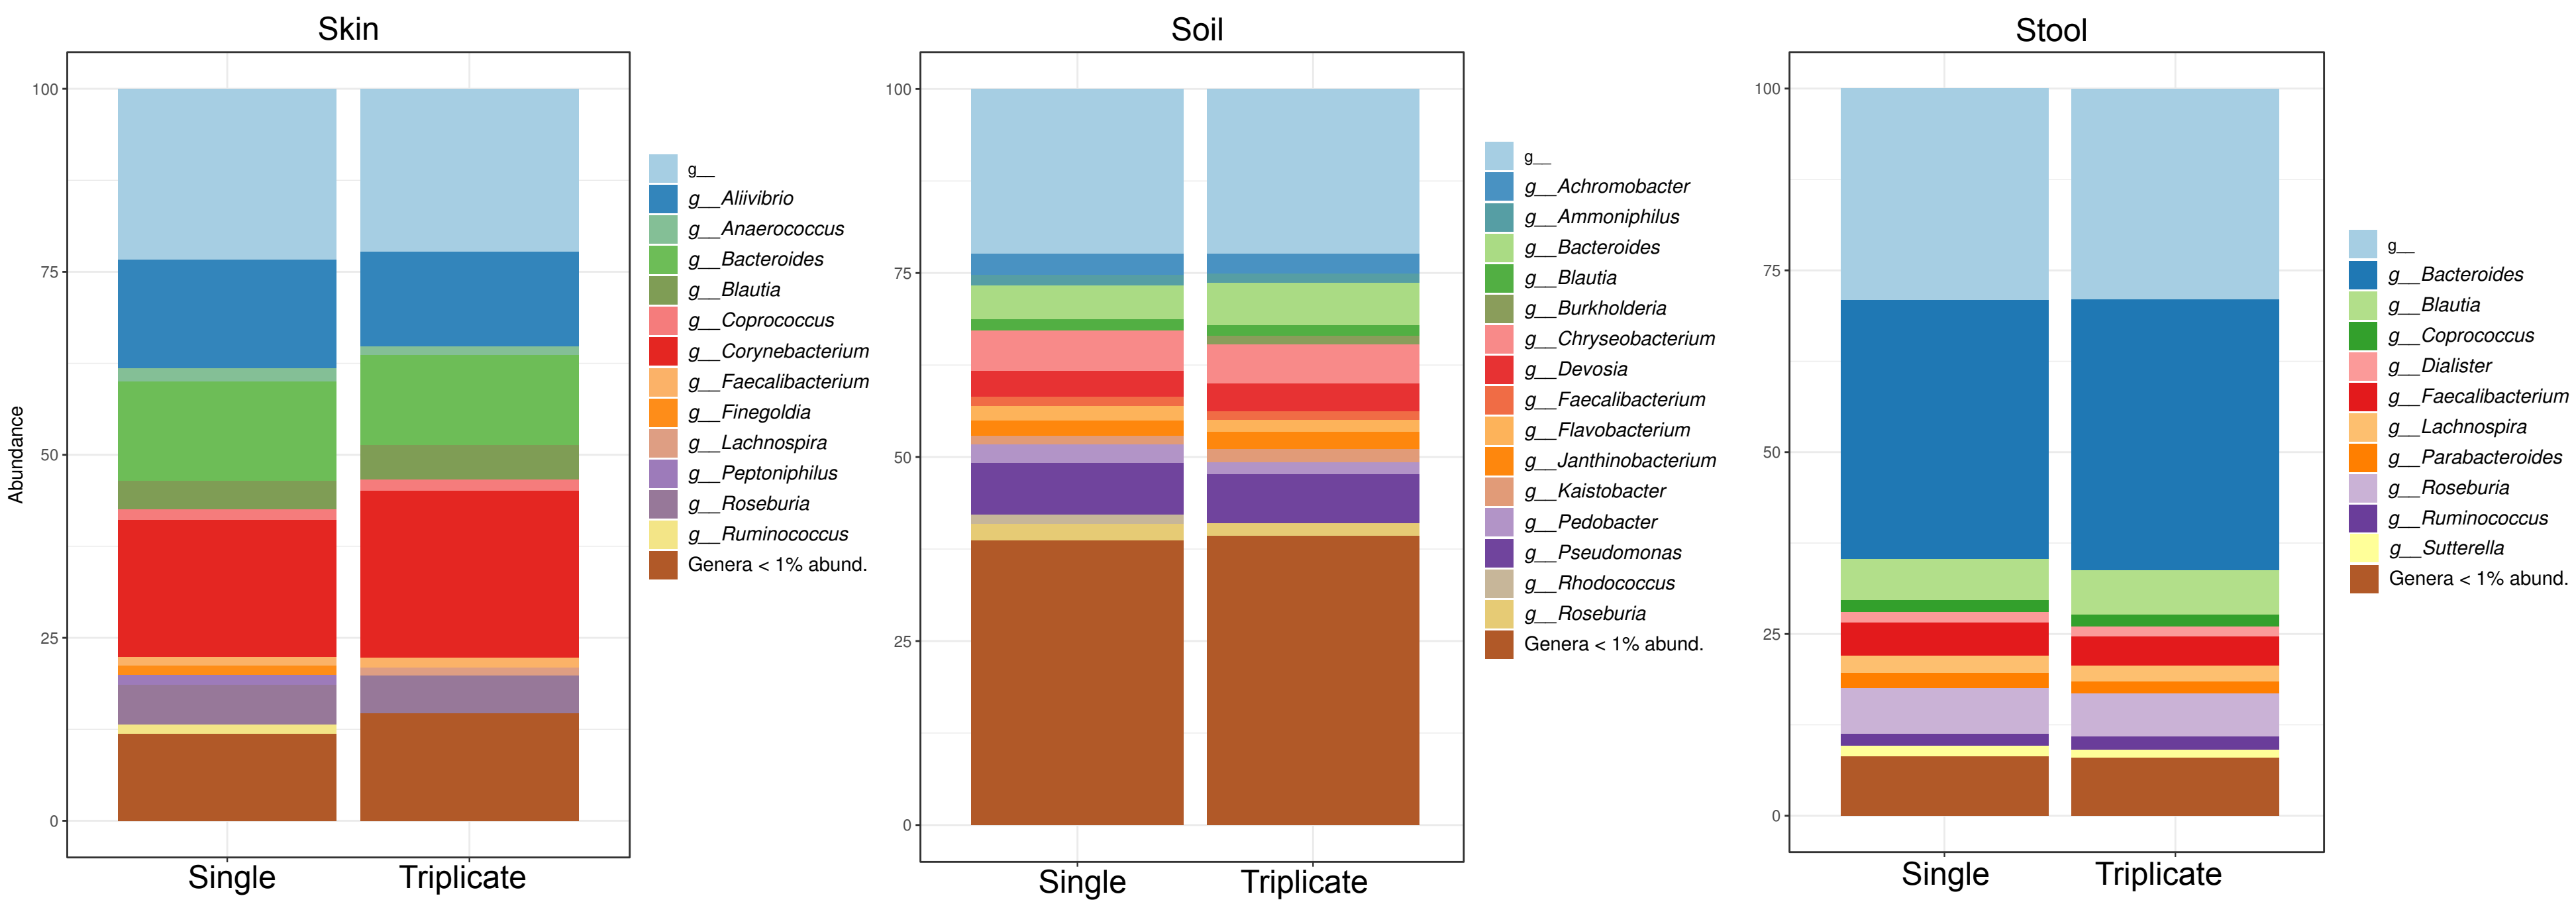

## B) Agricultural samples

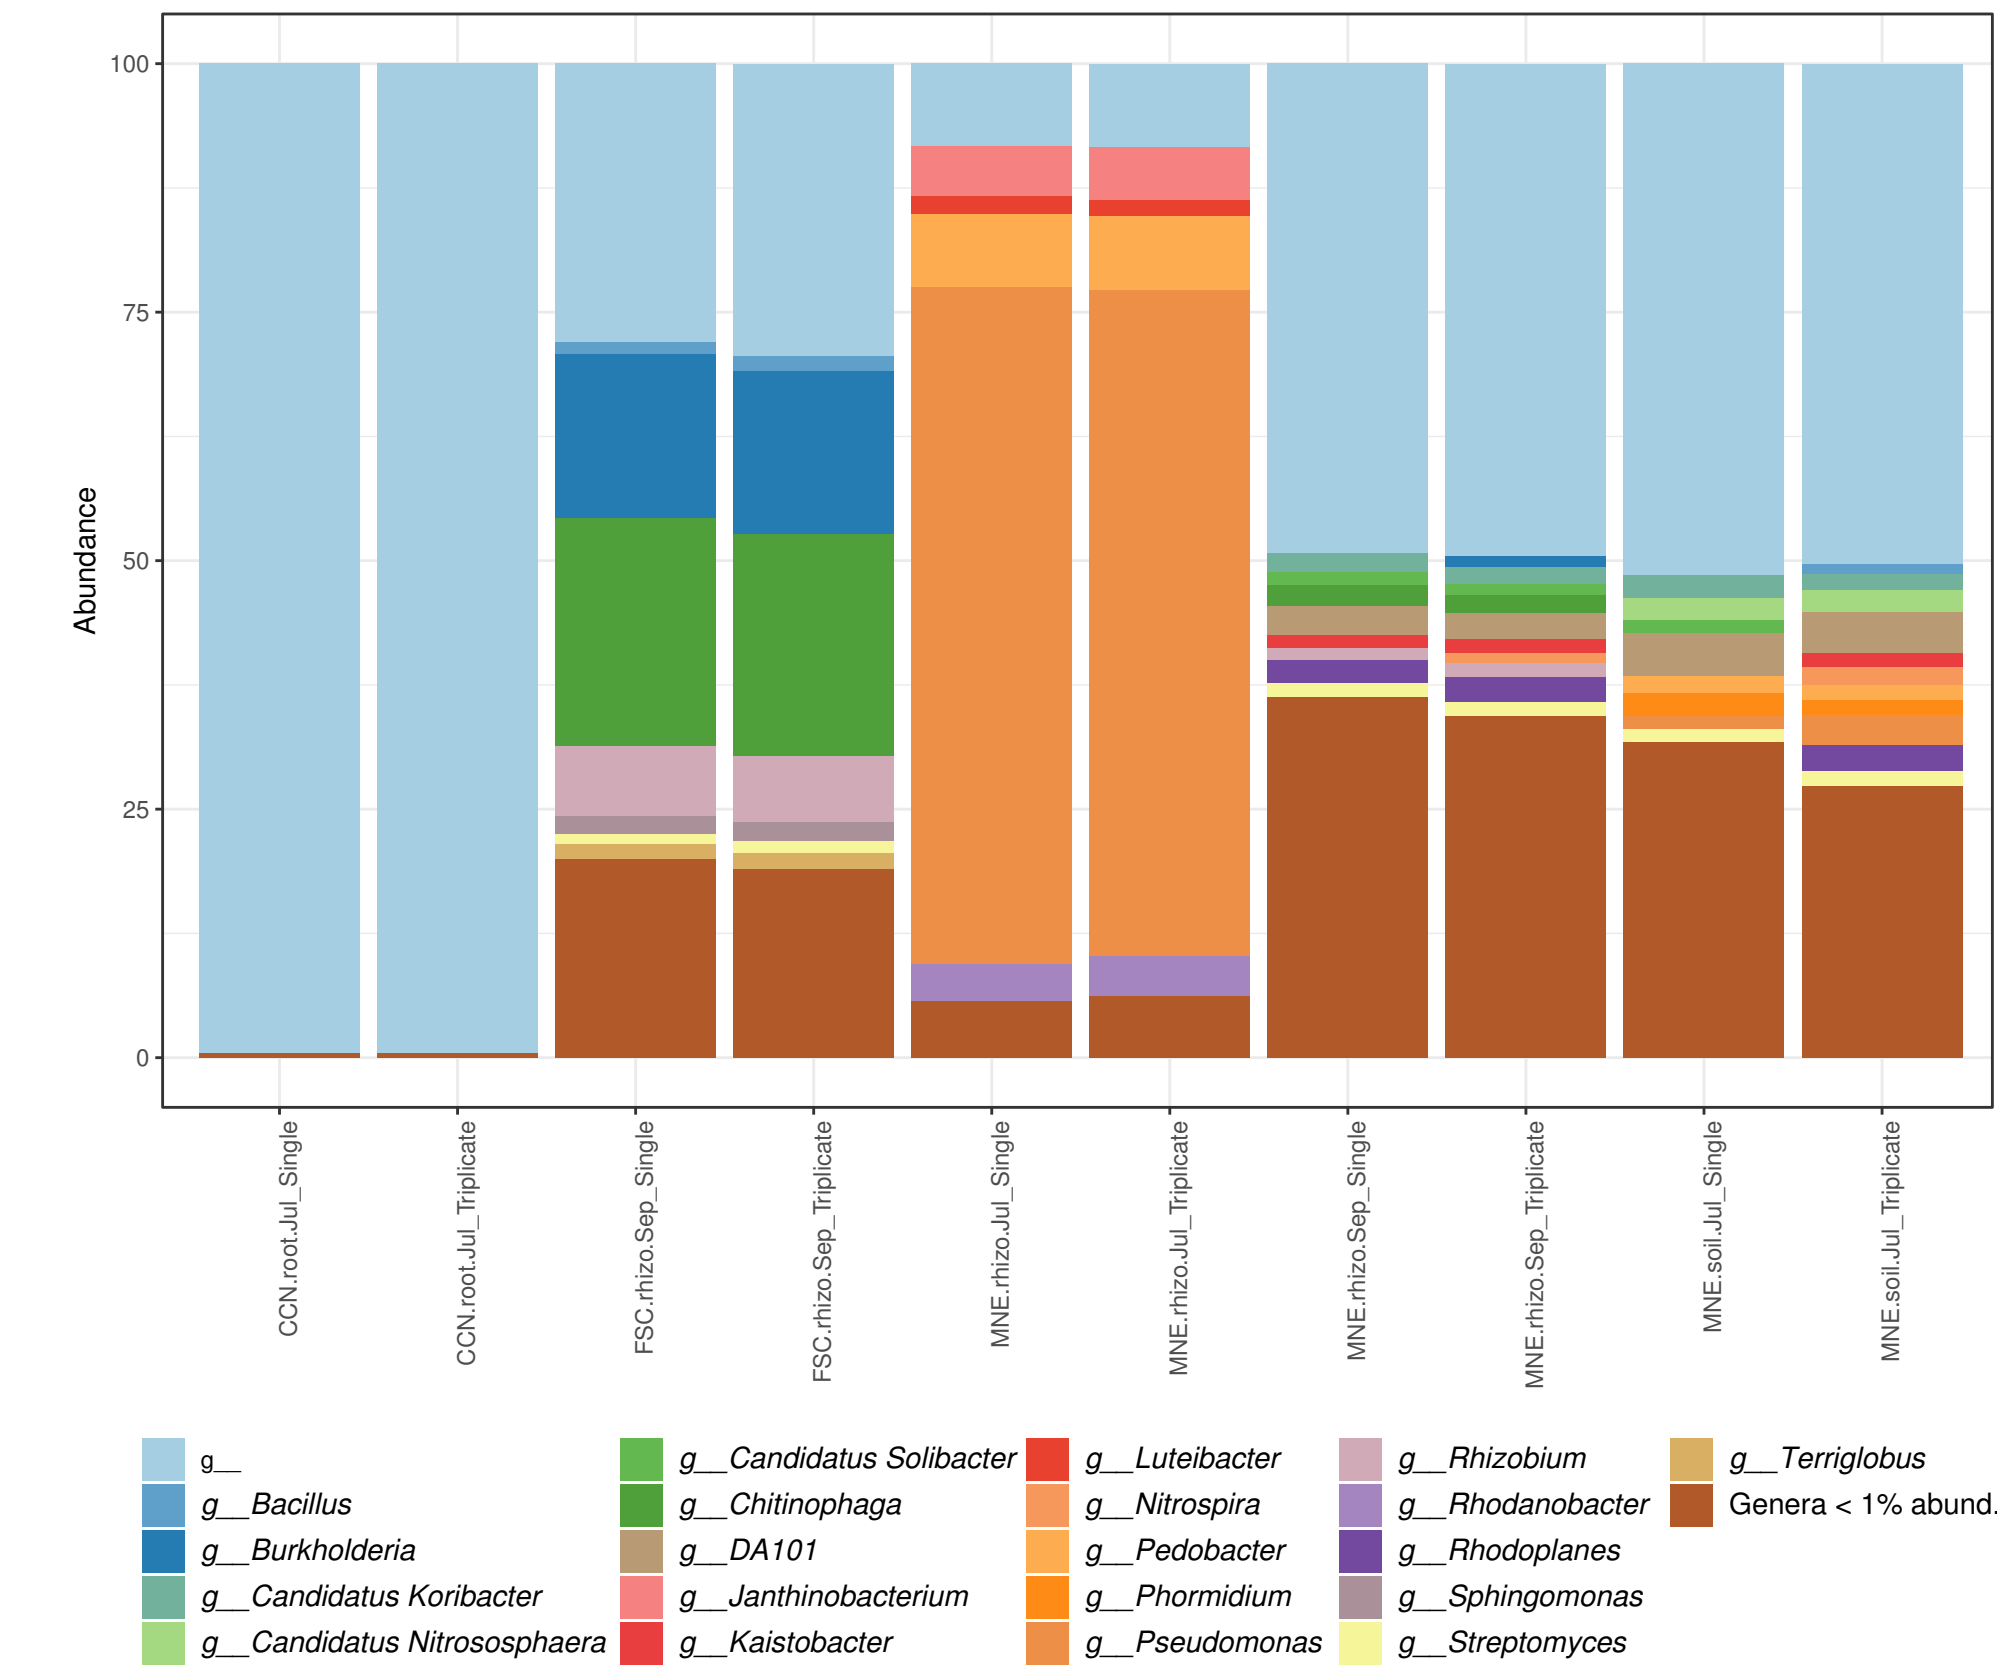

## C) Built environment samples

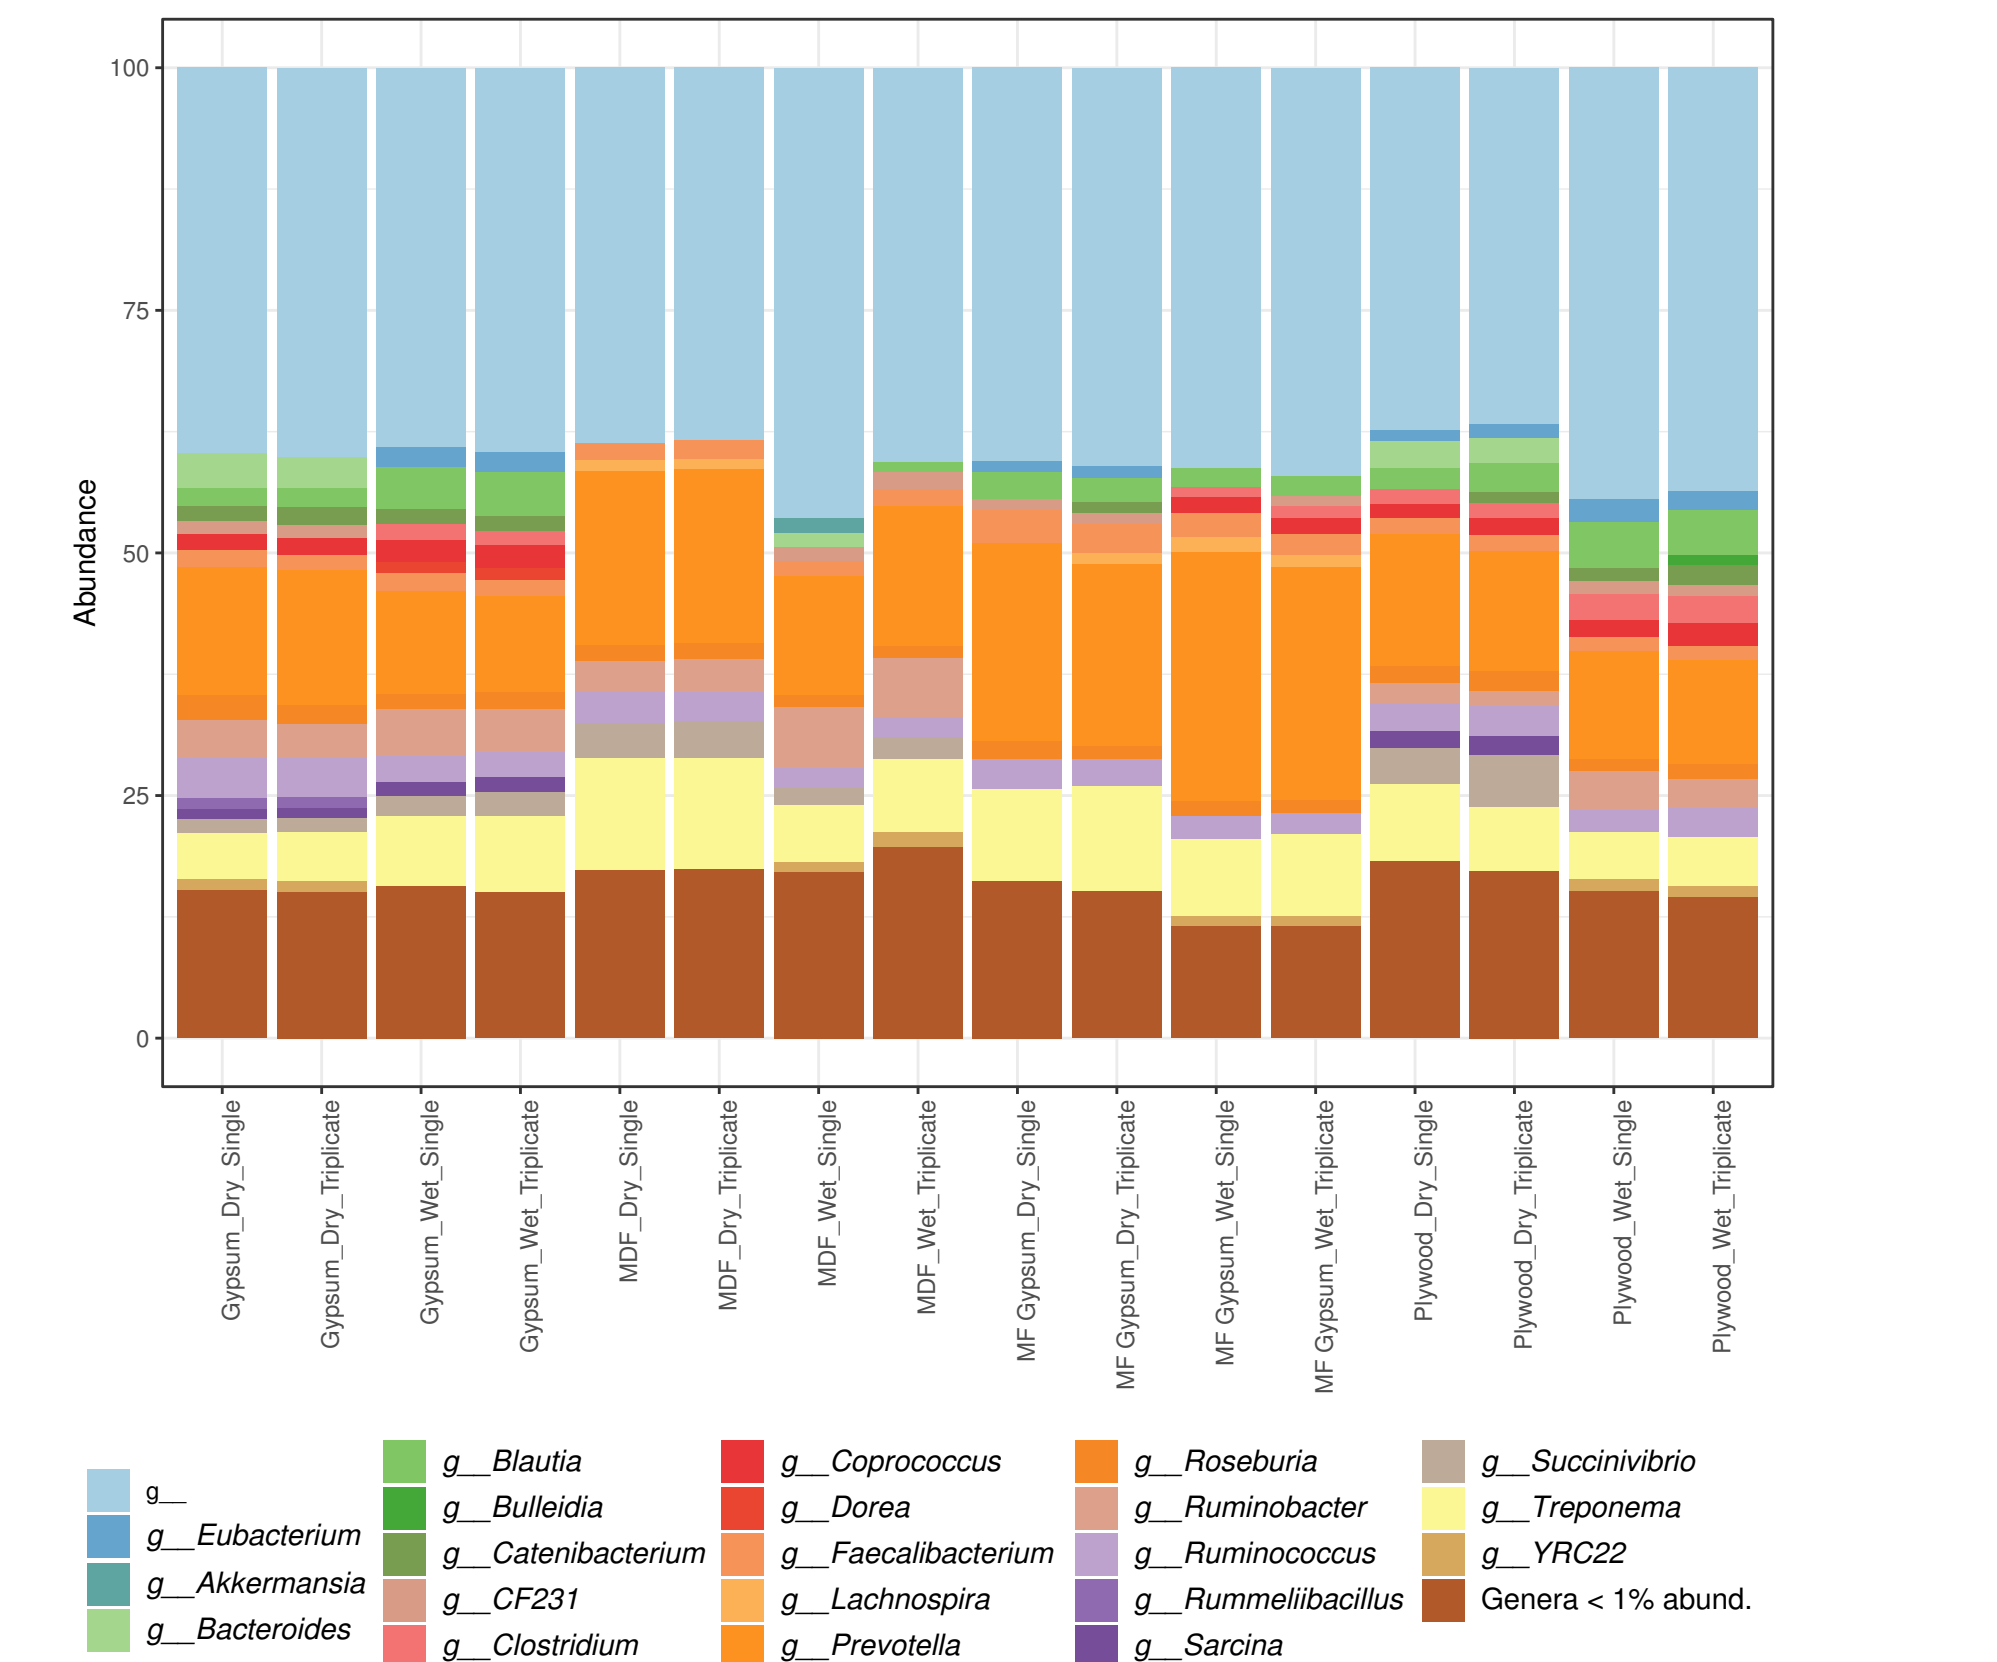

Supplement: NIHMS1064766-supplement-Figure_S1.pdf [file NIHMS1064766-supplement-Figure_S1.pdf]
