# Supplementary material
Source: PubMed Central journal article supplement (PMC7030937)

# A) Highest 10% GC-content taxa

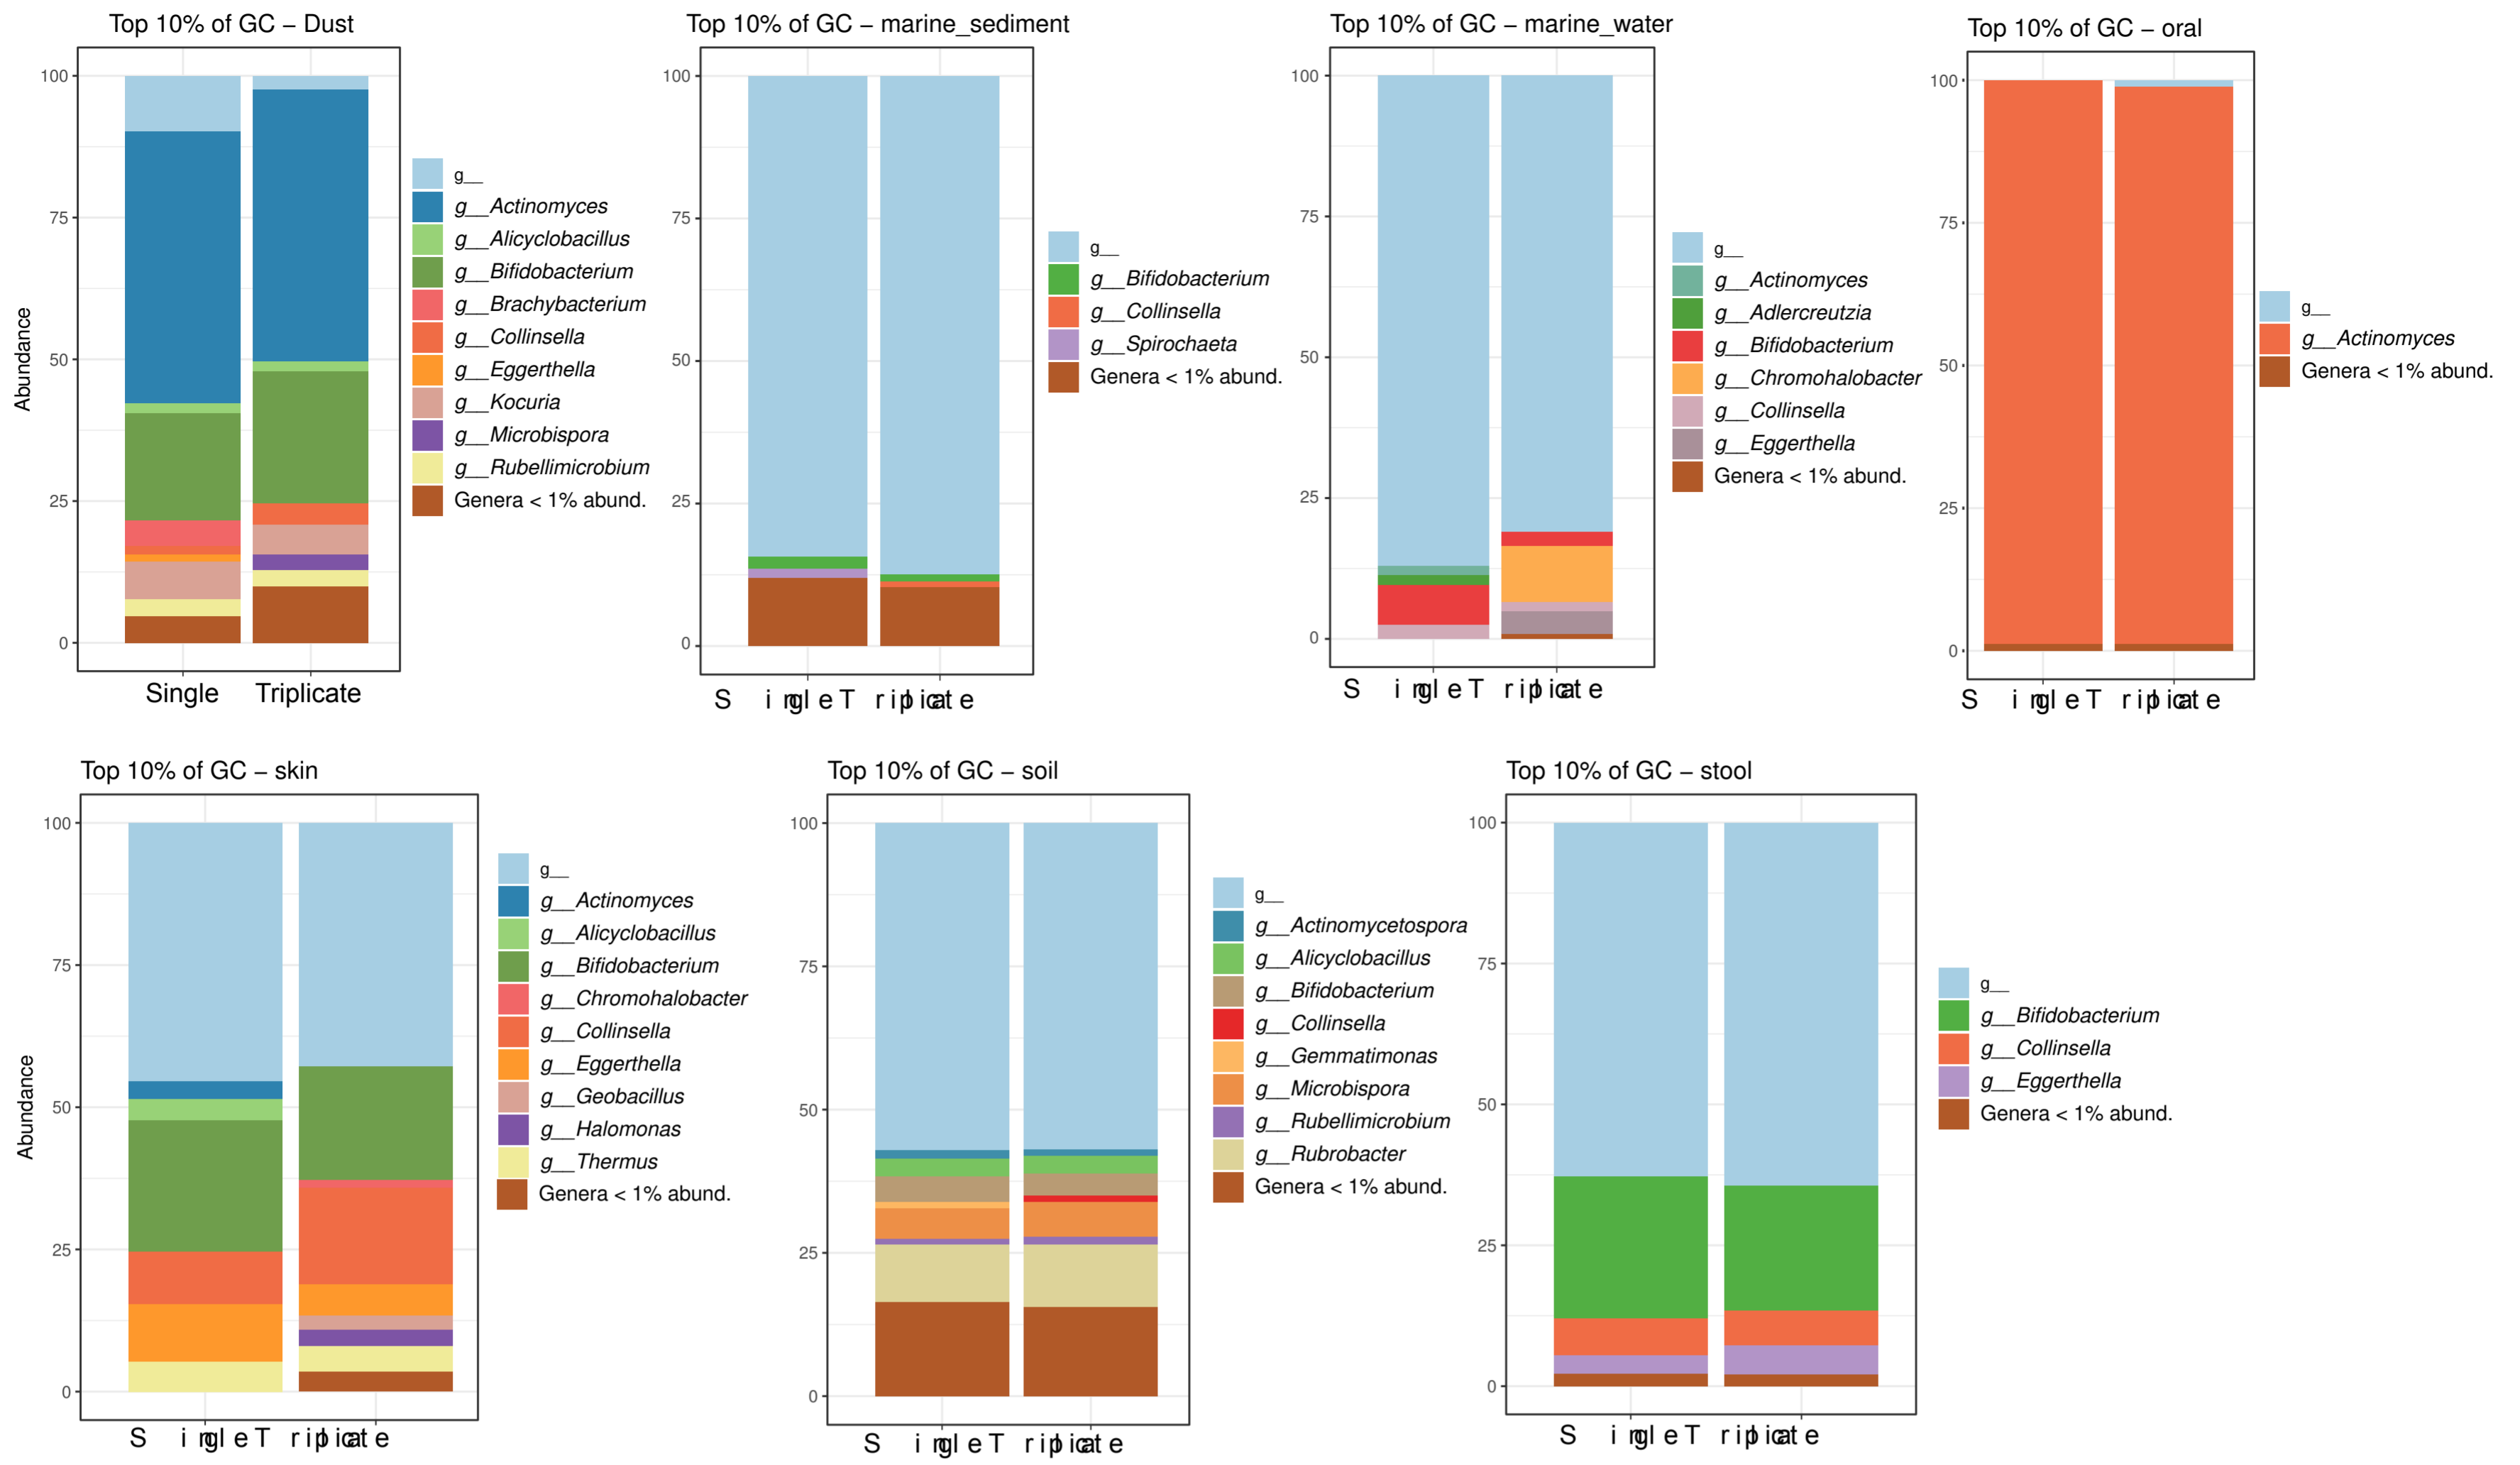

# B) Lowest 10% GC-content taxa

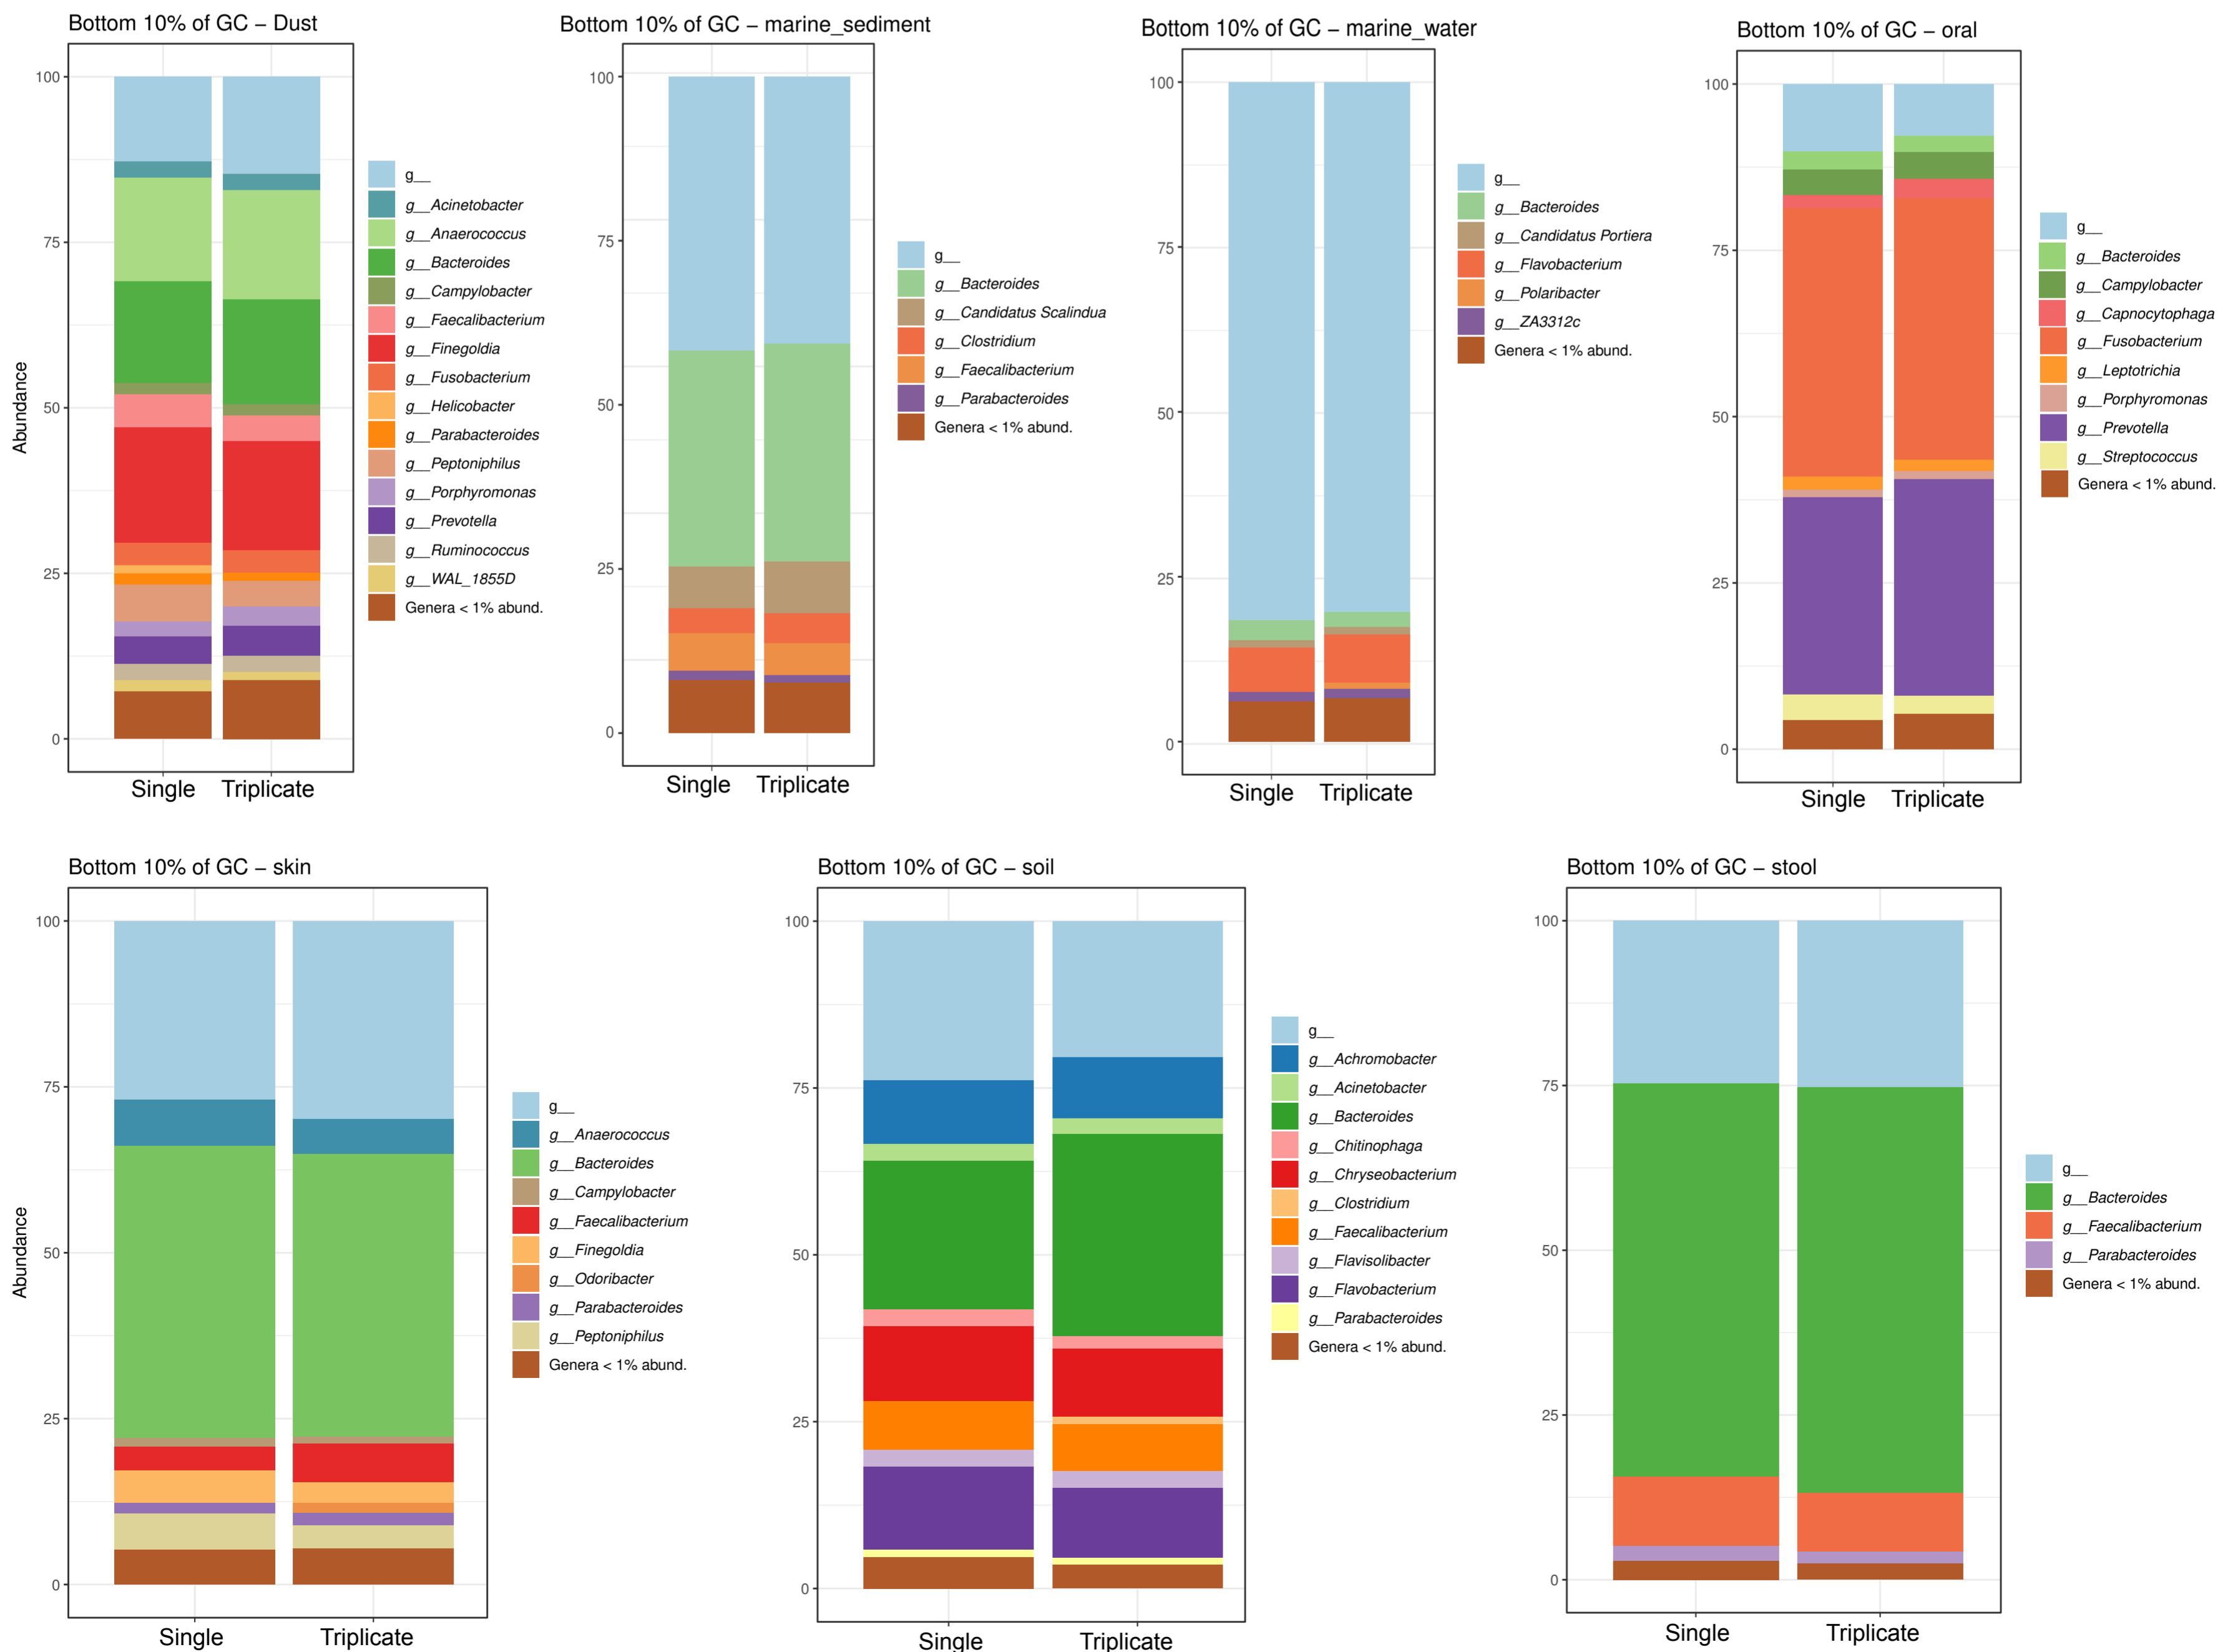

Supplement: NIHMS1064766-supplement-Figure_S2.pdf [file NIHMS1064766-supplement-Figure_S2.pdf]

## A) Highest 10% GC-content taxa

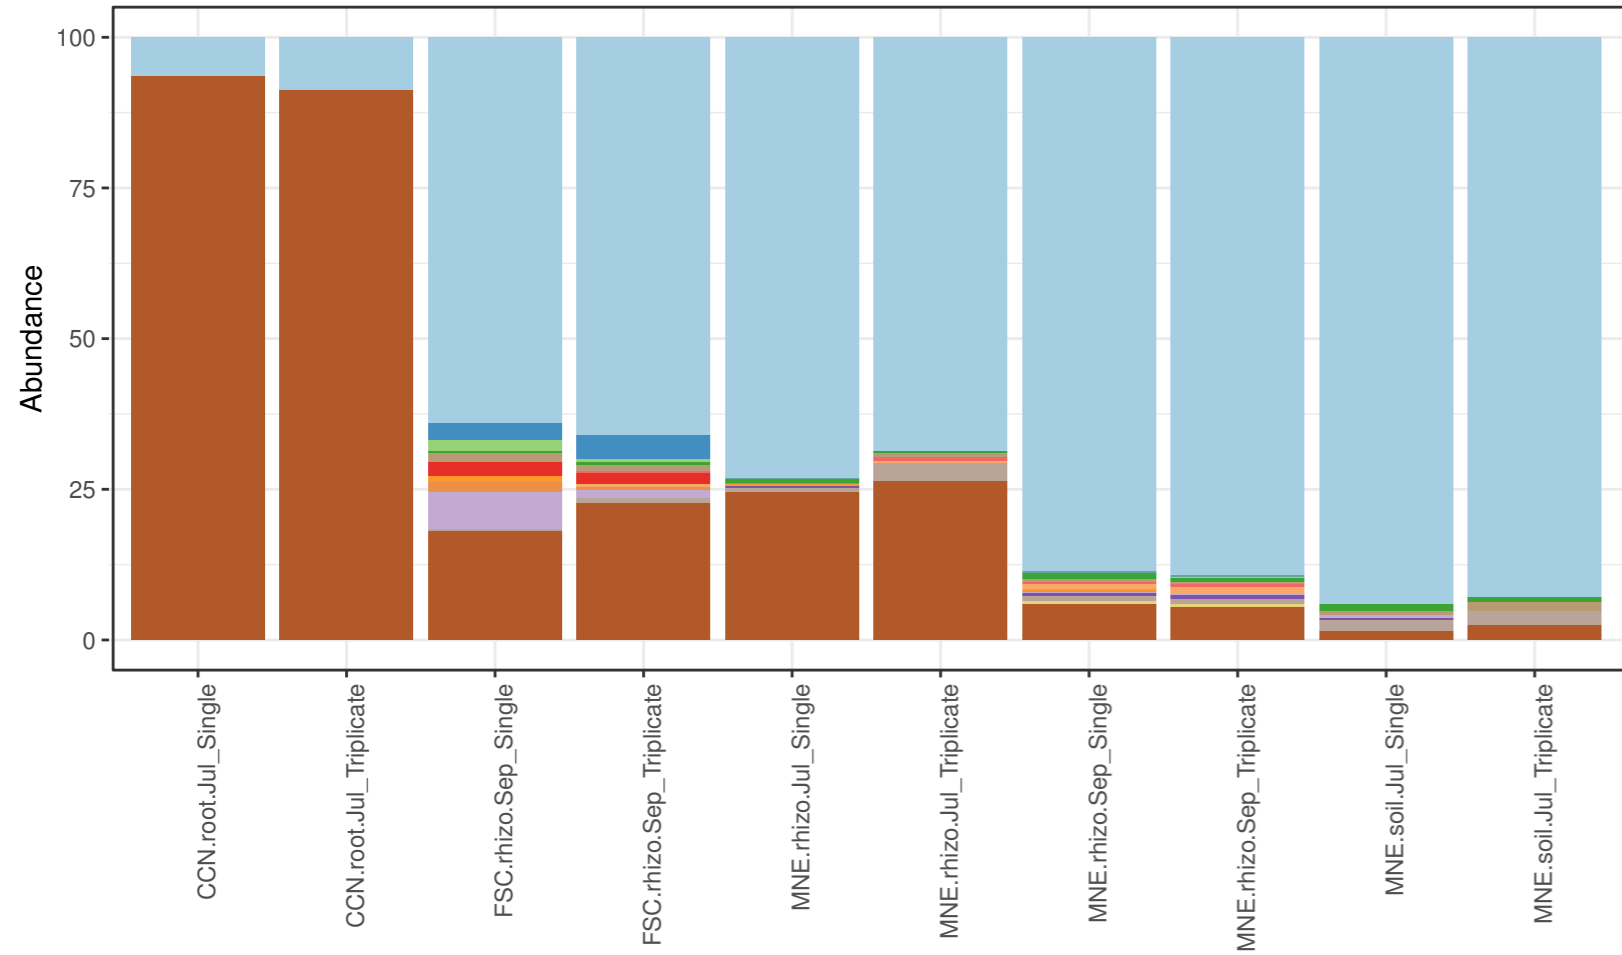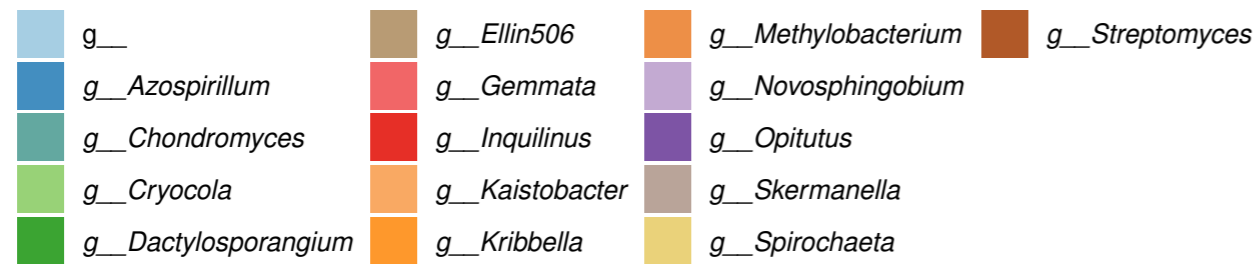

## B) Lowest 10% GC-content taxa

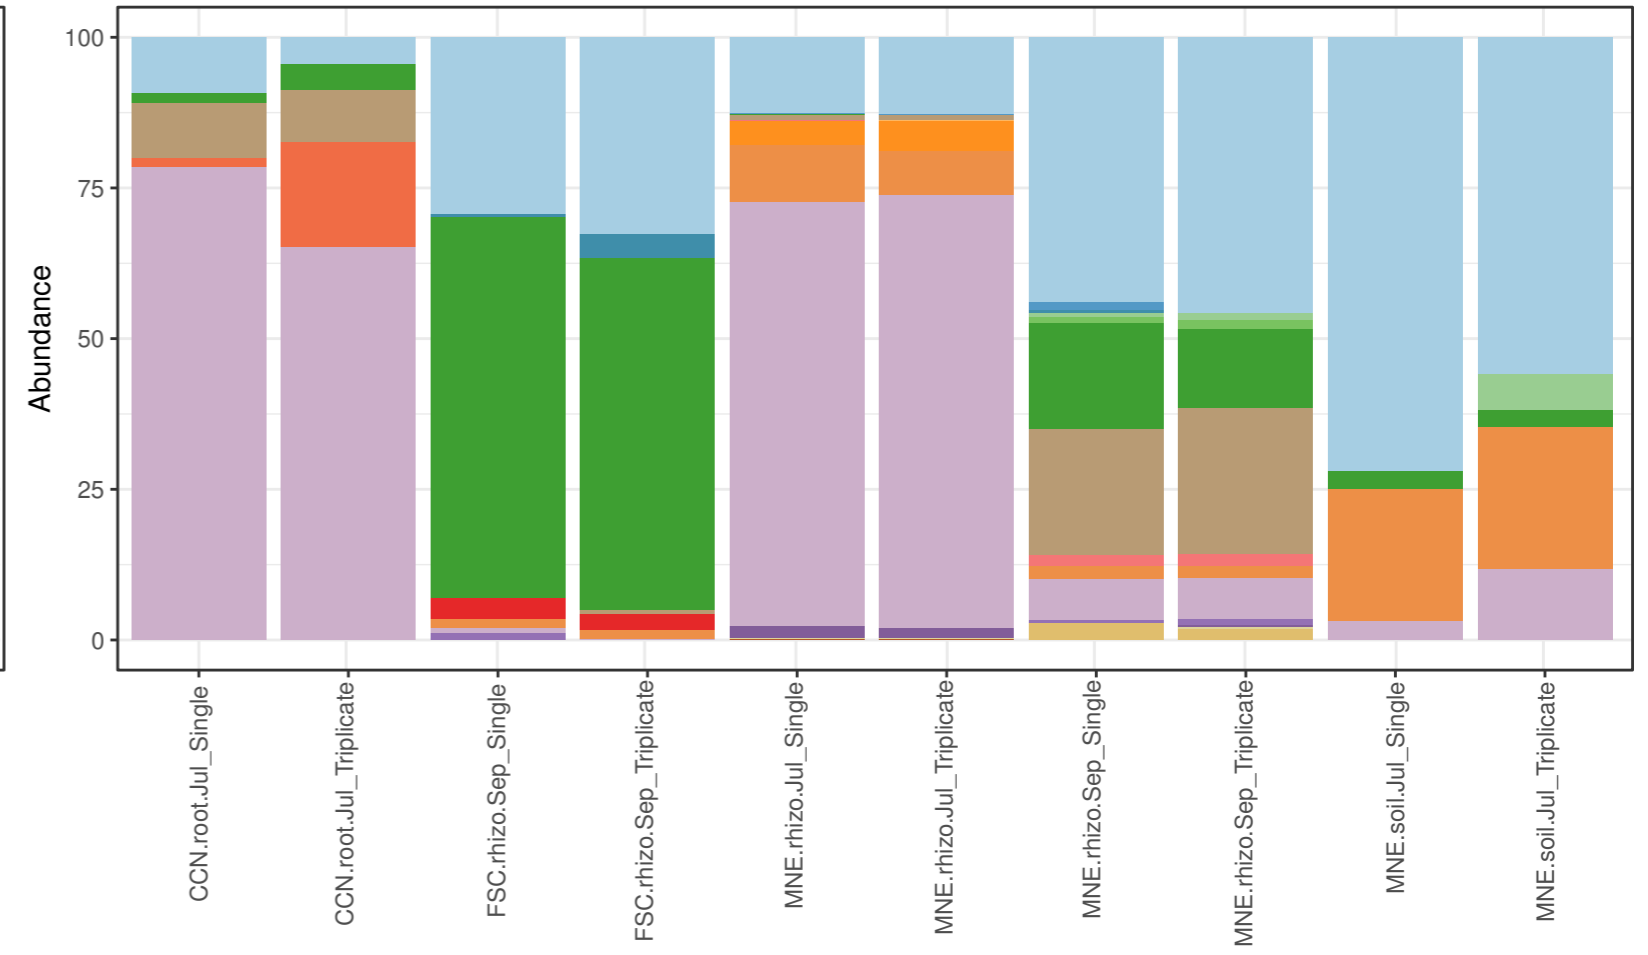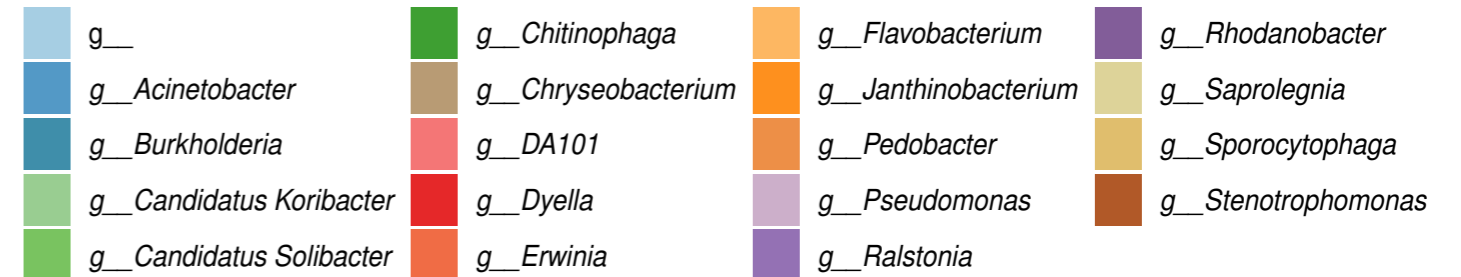

Supplement: NIHMS1064766-supplement-Figure_S3.pdf [file NIHMS1064766-supplement-Figure_S3.pdf]

### A) Highest 10% GC-content taxa

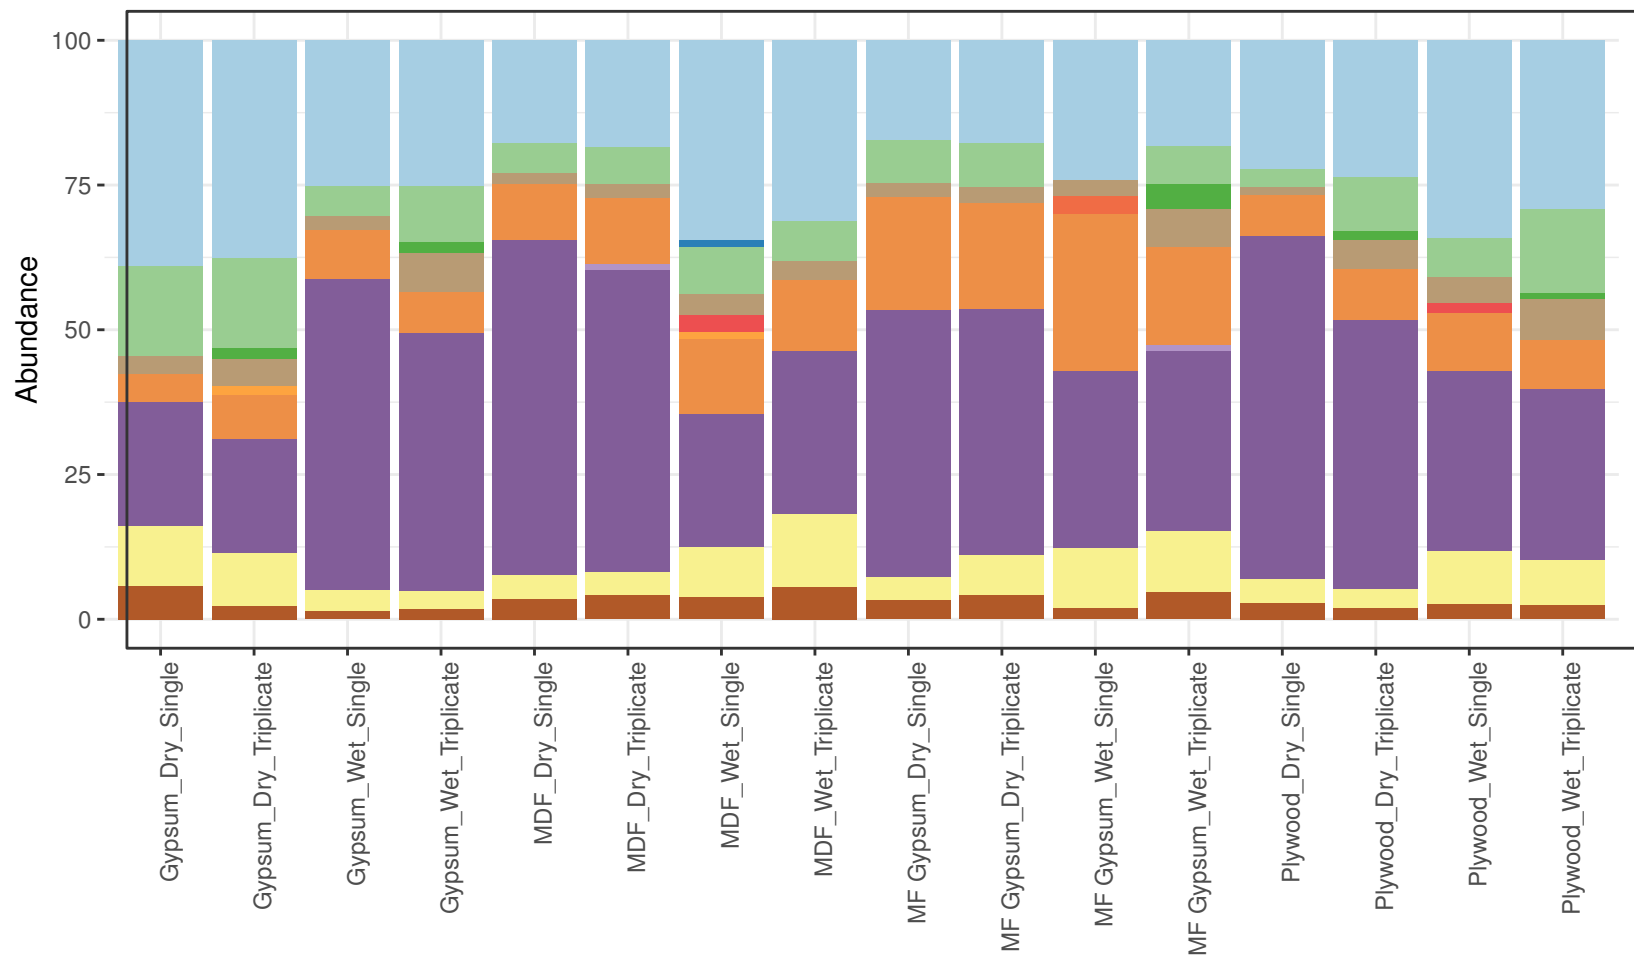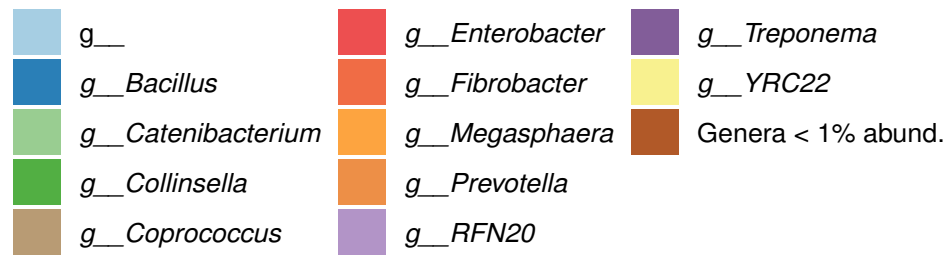

### B) Lowest 10% GC-content taxa

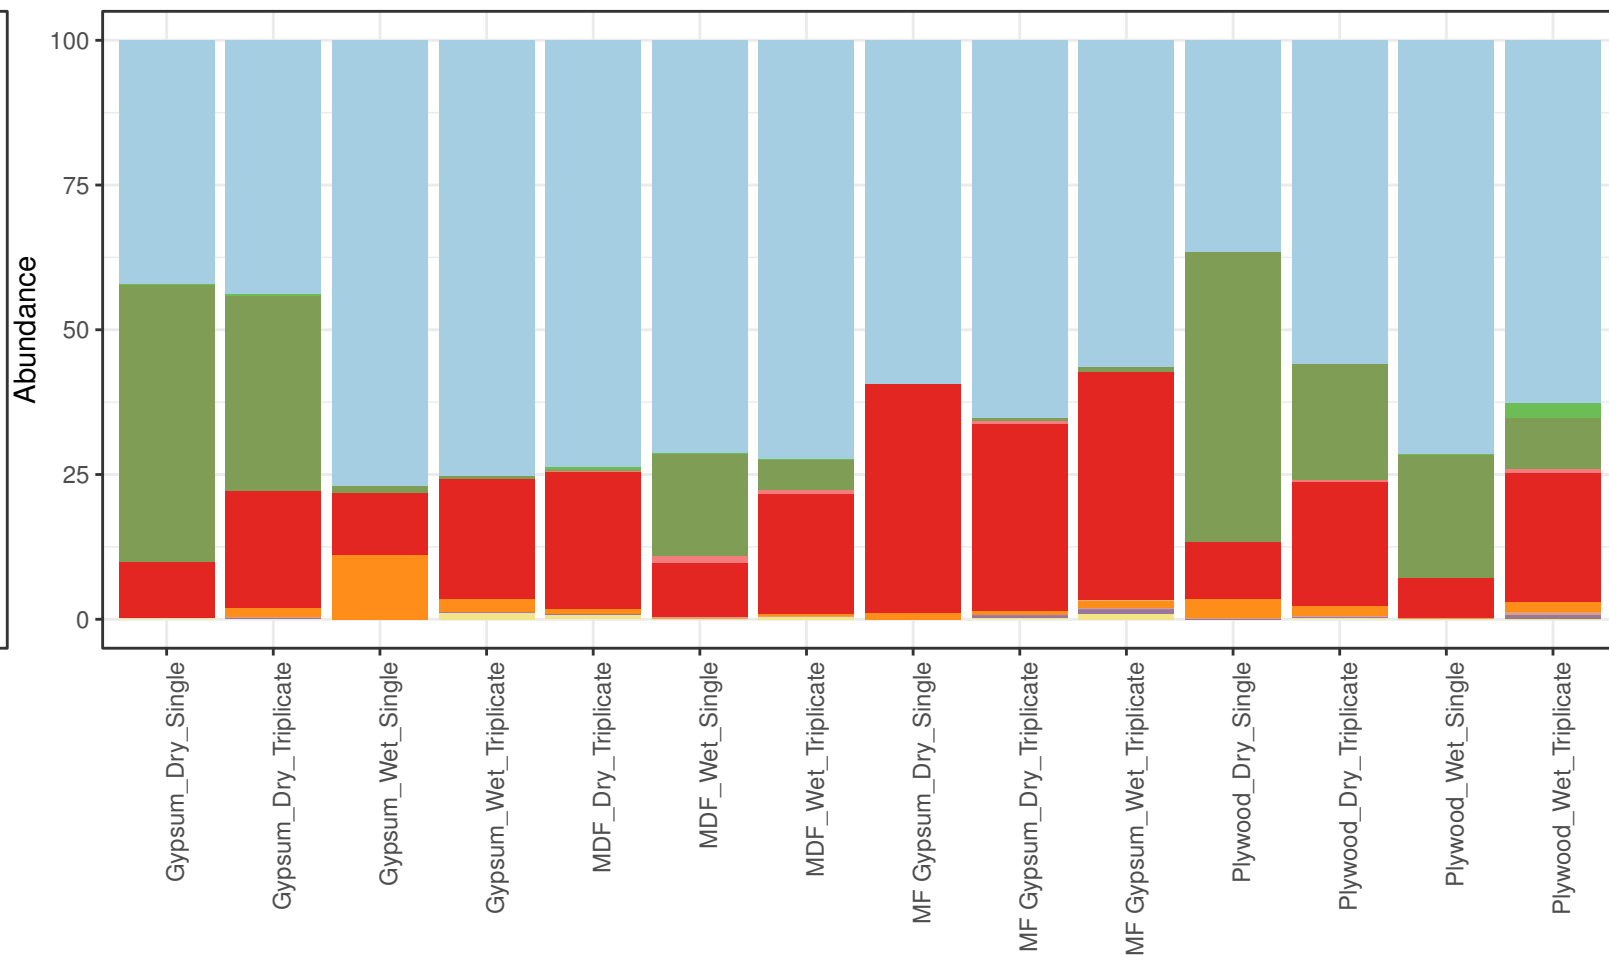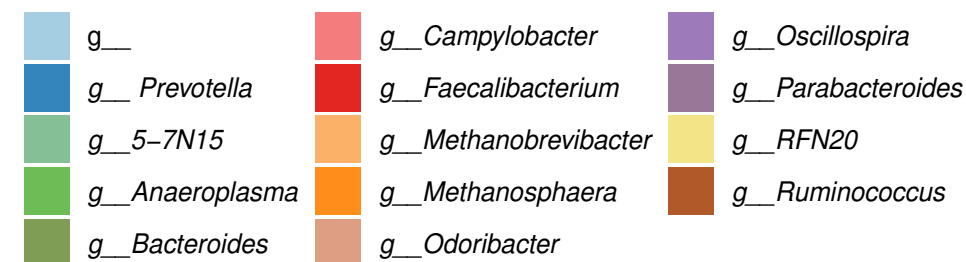

Supplement: NIHMS1064766-supplement-Figure_S4.pdf [file NIHMS1064766-supplement-Figure_S4.pdf]
